# Supplementary material
Source: MDPI journal article supplement (https://www.mdpi.com/2073-4344/7/12/385)
Supplement: s1 [file s1]

# Supplementary Materials

## Cu Nanoparticles/Fluorine-Doped Tin Oxide (FTO) Nanocomposites for Photocatalytic H<sub>2</sub> Evolution under Visible Light Irradiation

Hui Liu <sup>1</sup>, An Wang <sup>1</sup>, Quan Sun <sup>1</sup>, Tingting Wang <sup>1,\*</sup> and Heping Zeng <sup>1,\*</sup>

<sup>1</sup> Key Laboratory of Functional Molecular Engineering of Guangdong Province, School of Chemistry & Chemical Engineering, South China University of Technology, Guangzhou 510640, P. R. China; cehuiliu@mail.scut.edu.cn (H.L.); ceakwong@mail.scut.edu.cn (A.W.); boldymansun@163.com (Q.S.)

\* Correspondence: hpzeng@scut.edu.cn (H.Z.); ttwang@scut.edu.cn (T.W.)

Tel.: +86-208-711-2631 (H.Z.); +86-208-711-2631 (T.W.)

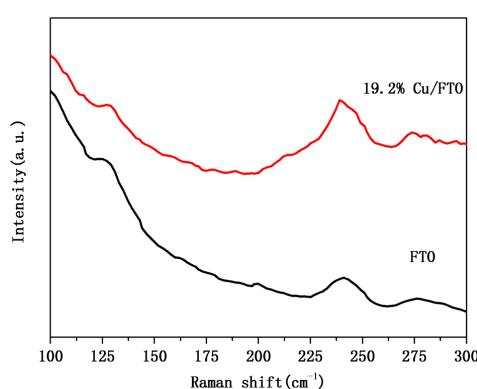

**Figure S1.** Raman spectra of FTO and 19.2% Cu/FTO.

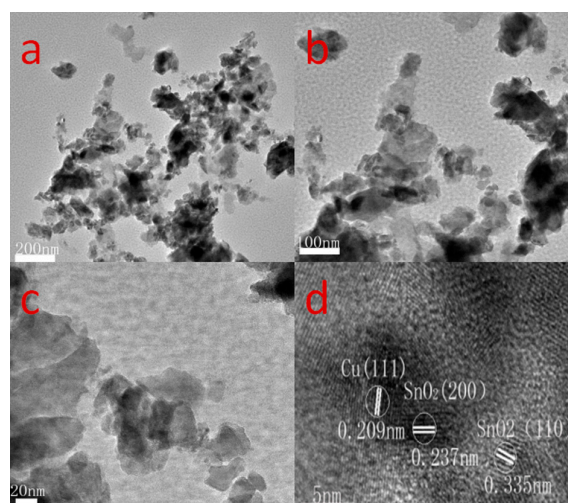

**Figure S2.** TEM (transmission electron microscopy) (a) and HRTEM (high resolution transmission electron microscopy) (b) of as-prepared 19.2% Cu/FTO sample.

The samples for TEM were prepared as follows: 0.005g of as-prepared Cu/FTO was dissolved in 1ml of ethanol and sonicated for 30min to form a homogeneous suspension. The homogeneous suspension was dripped onto ultrathin carbon film and then dried in air at room temperature.

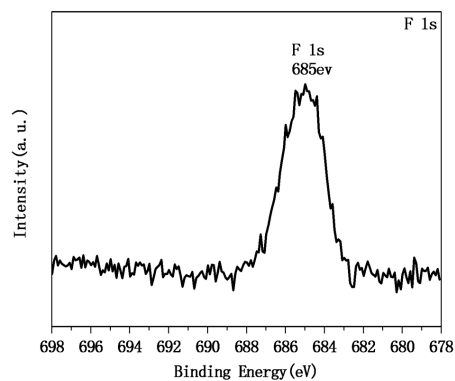

Figure S3. F 1s spectra of 19.2% Cu/FTO with XPS characterization.

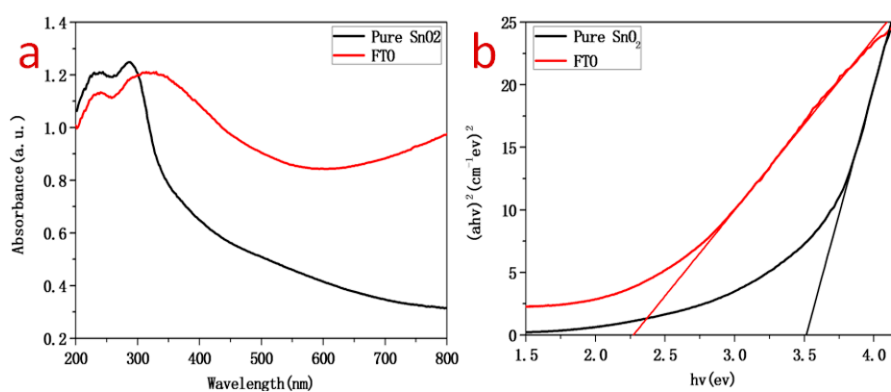

Figure S4. UV-VIS (UV-visible diffuse-reflectance spectrum) (a) and optical band gap spectra (b) of pure SnO<sub>2</sub> and FTO.

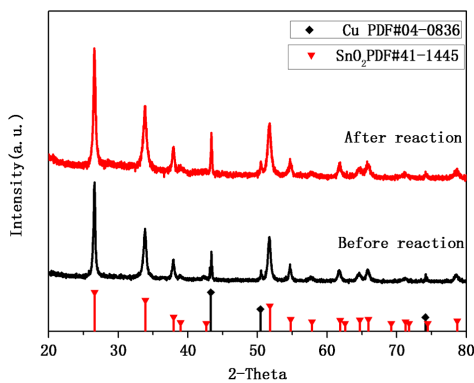

Figure S5. XRD (X-ray diffraction) patterns of 19.2% Cu/FTO before and after the stability test of hydrogen evolution.
